# Supplementary material
Source: Springer Nature journal article supplement (https://www.springermedizin.de/resource/supplementary/13054_2012_1701_MOESM2_ESM.pdf/9711260)
Supplement: MOESM2 [file 9711260]

162 Patients required MV > 3 days by orotracheal tube

50 Patients fulfilled the inclusion criteria

10 had not obtained Informed Consent

40 Patients randomized

20 assigned  
to receive NIV

20 assigned  
to receive oxygen mask

20 completed trial

18 completed trial  
2 patients withdrew from the study

20 included in analysis

18 included in analysis
